# Supplementary material for: Enhanced CAR-T activity against established tumors by polarizing human T cells to secrete interleukin-9
Source: PubMed Central journal article supplement (PMC7677397; doi:10.1038/s41467-020-19672-2), 2020-11-19
Supplement: 41467_2020_19672_MOESM1_ESM.pdf [file 41467_2020_19672_MOESM1_ESM.pdf]

## Supplementary Information

# **Enhanced CAR-T activity against established tumors by polarizing human T cells to secrete interleukin-9**

Lintao Liu<sup>1\*</sup>, Enguang Bi<sup>1\*#</sup>, Xingzhe Ma<sup>1\*</sup>, Wei Xiong<sup>1\*</sup>, Jianfei Qian<sup>1</sup>, Lingqun Ye<sup>1</sup>, Pan Su<sup>1</sup>,  
Qiang Wang<sup>1</sup>, Liuling Xiao<sup>1</sup>, Maojie Yang<sup>1</sup>, Yong Lu<sup>2</sup>, Qing Yi<sup>1#</sup>

Supplementary Figures 1-11

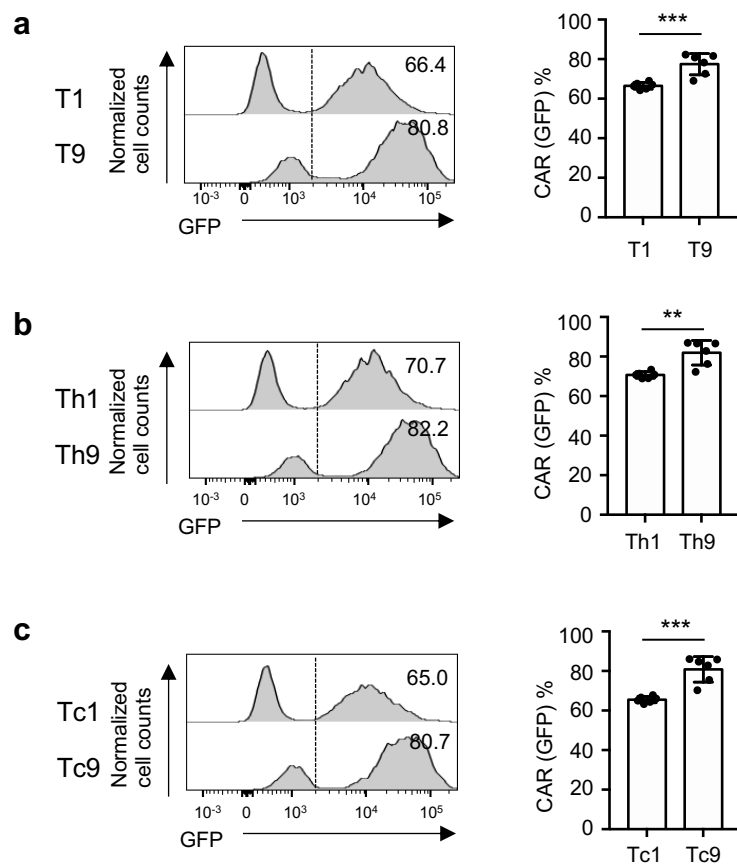

**Supplementary Figure 1. CAR expression in CAR-T cells.** CAR-T cells were generated and expanded for 16 days under Th1- or Th9-polarization condition. Percentage of GFP positive T cells was calculated in gated (a) CD3<sup>+</sup>, (b) CD3<sup>+</sup>CD4<sup>+</sup>, or (c) CD3<sup>+</sup>CD8<sup>+</sup> T cell populations. Data are presented as mean  $\pm$  SD. n = 6 donors, \*P < 0.05 and \*\*\*P < 0.001, two-sided Student's *t*-test. Source data are provided as a Source Data file.

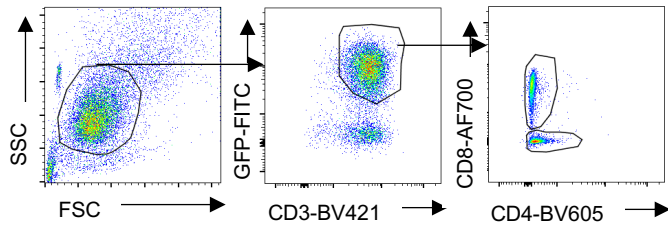

**Supplementary Figure 2. Gating strategy for analyzing GFP<sup>+</sup>CD3<sup>+</sup>CD4<sup>+</sup> or GFP<sup>+</sup>CD3<sup>+</sup>CD8<sup>+</sup> CAR-T cells.** This strategy was utilized to gate GFP<sup>+</sup>CD3<sup>+</sup>CD4<sup>+</sup> or GFP<sup>+</sup>CD3<sup>+</sup>CD8<sup>+</sup> CAR-T cells for analysis in this manuscript figures.

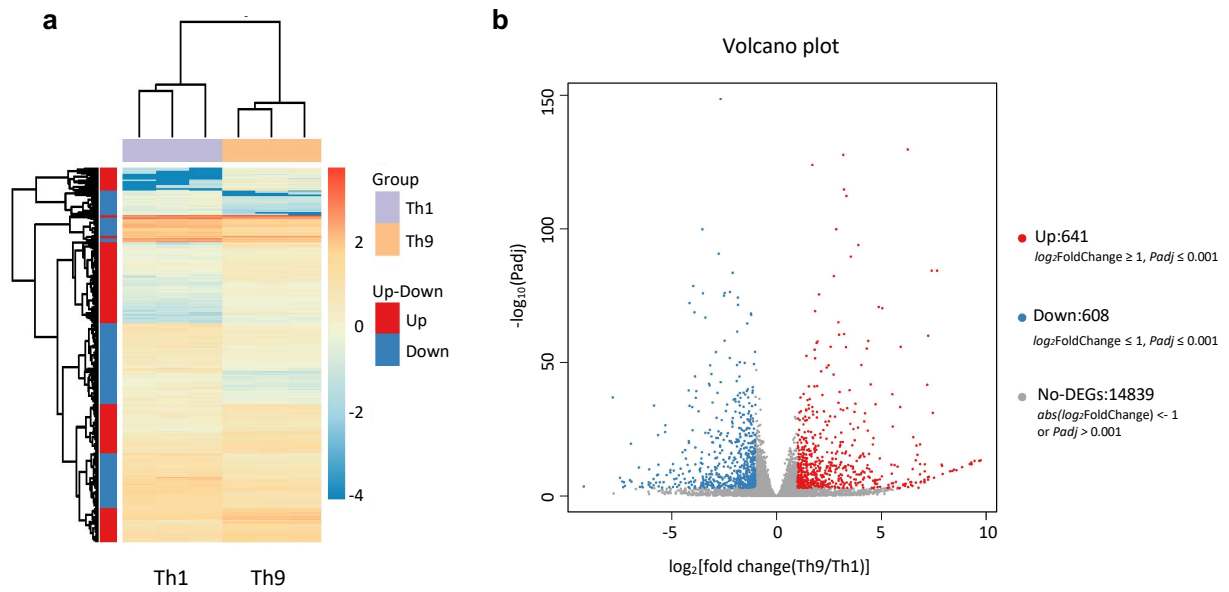

**Supplementary Figure 3. Summary of DNBSseq analysis. (a)** Global transcriptional profiles revealed by DNseq of purified CAR-T cells polarized and expanded for 16 days after lentivirus transduction. The heatmap shows the log<sub>2</sub>-fold change relative to the global average of the top upregulated and downregulated genes, with a cutoff of change in expression >2-fold and a p value < 0.05. **(b)** Volcano plot showing differentially expressed genes identified through RNA sequencing (Th1 CAR-T and Th9 CAR-T cells; n = 3 donors).

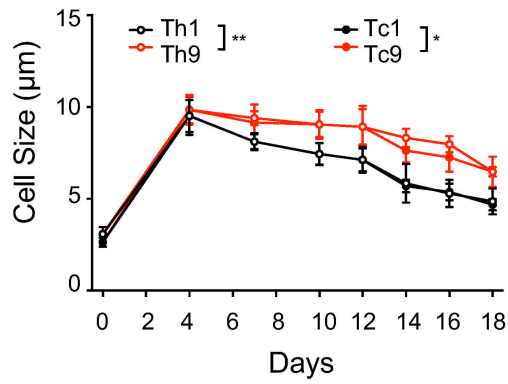

**Supplementary Figure 4. Cells size of CAR-T cells.** Size of CAR-T cells was measured by cell counters at indicated time points. T cell size during ex vivo expansion was monitored after anti-CD3/CD28 bead stimulation until day 18. Results are expressed as the mean T cell size ( $\pm$  SD).  $n = 4$  donors, \* $P < 0.05$  and \*\* $P < 0.01$ , two-way ANOVA. Source data are provided as a Source Data file.

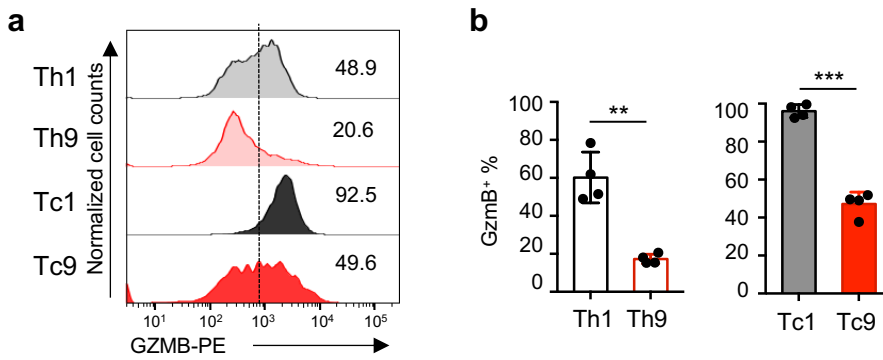

**Supplementary Figure 5. GzmB expression in CAR-T cells.** (a) Representative flow plots showing granzyme B expression in CAR-T cells on day 16 after in-vitro expansion. Cells were pre-gated for GFP<sup>+</sup>CD3<sup>+</sup>CD8<sup>+</sup> or GFP<sup>+</sup>CD3<sup>+</sup>CD4<sup>+</sup> T cells. (b) Sumarized results showing expression of granzyme B in CAR-T cells. Data are presented as mean ± SD (n = 4 donors, \*\*P < 0.01 and \*\*\*P < 0.001, two-sided Student's *t*-test). Source data are provided as a Source Data file.

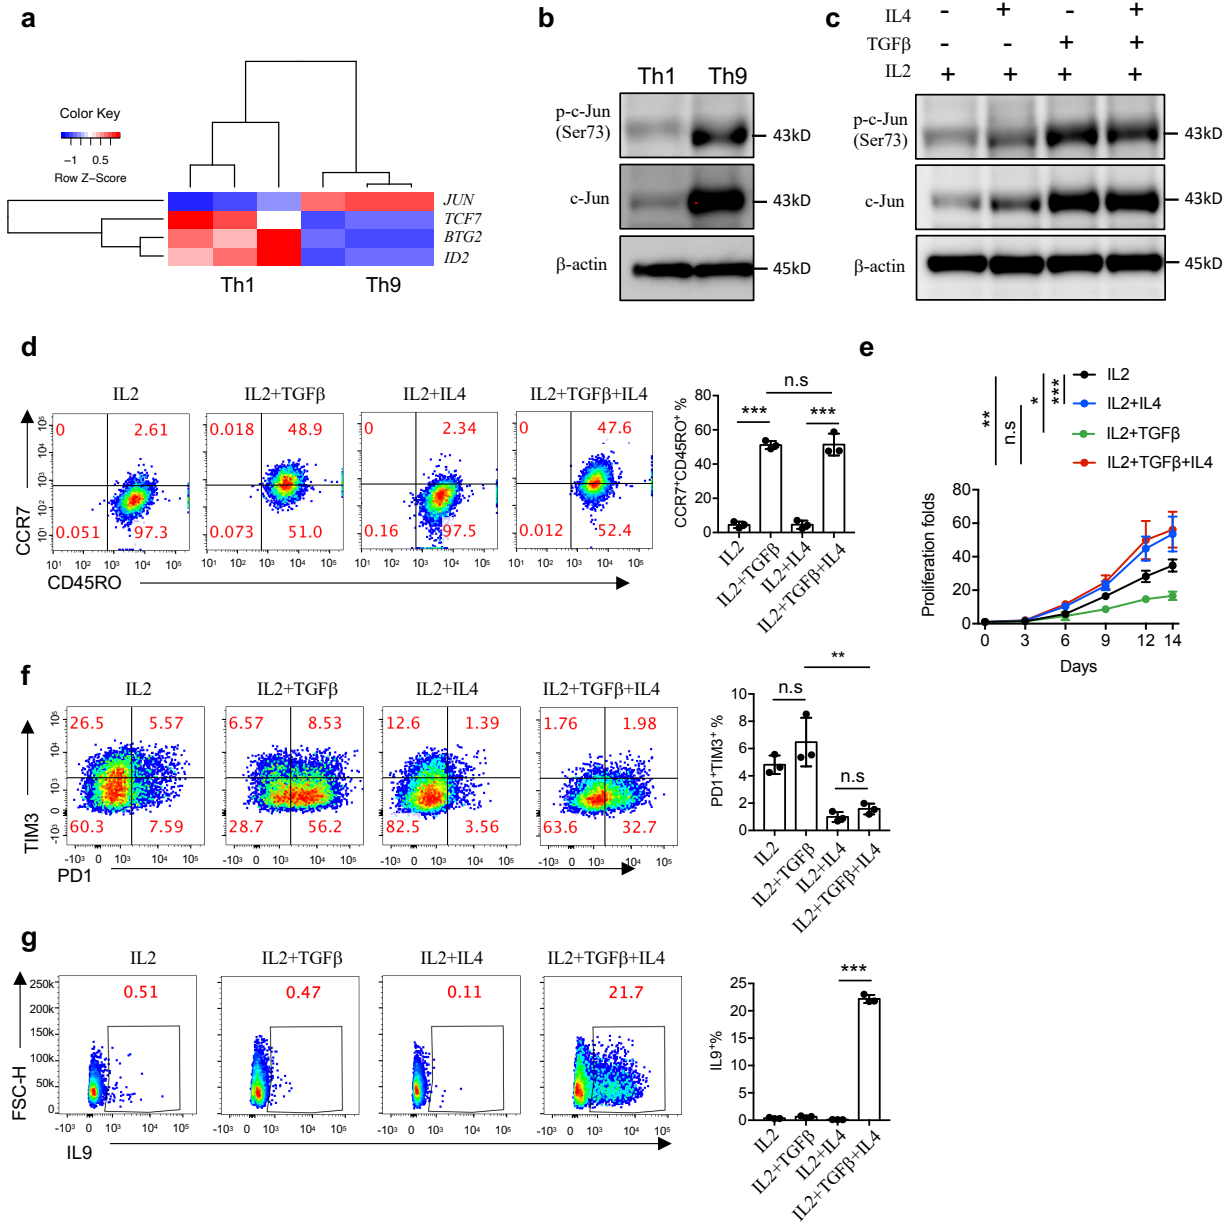

### Supplementary Figure 6. IL4 and TGFβ act in synergy to dictate the phenotype of T9

**CAR-T cells.** (a) Heatmap illustrating the expression of genes of transcription factors in Th9 or Th1 CAR-T cells. (b) CAR-T cells were activated with anti-CD3/CD28 beads for 14 days, and the indicated proteins were analyzed by Western blot. CAR-T cells were activated with anti-CD3/CD28 beads for 14 days under different polarization conditions, and assayed for (c)

expression of the indicated proteins by Western blot, (e) proliferation by trypan blue exclusion (n = 4 donors, two-way ANOVA), (d) memory markers (CCR7 and CD45RO) (n = 3 donors), (f) exhaustion markers (n = 3 donors), and (g) IL9 expression by flow cytometry (n = 3 donors).

Data shown in c are representative of three independent experiments. Data are presented as mean  $\pm$  SD, n.s= no significance, \*P < 0.05, \*\*P < 0.01, and \*\*\*P < 0.001, two-sided Student's *t*-test.

Source data are provided as a Source Data file.



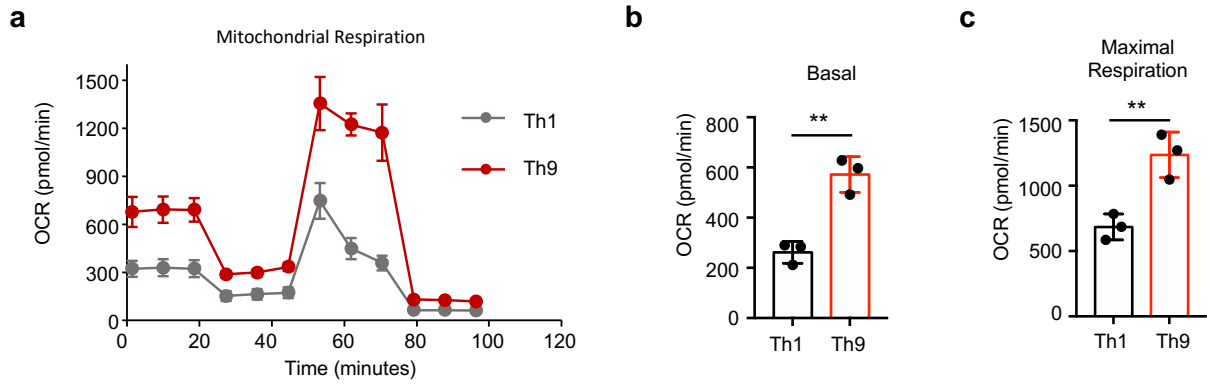

**Supplementary Figure 7.** (a) Oxygen consumption rates (OCRs), (b) basal OCR levels, and (c) maximum respiratory levels in human CD4 C AR-T cells 16 days after anti-CD3/CD28 beads stimulation. Experiments were performed with three biological replicates and data shown are representative of two independent experiments. Data are presented as mean  $\pm$  SD. \*\* $P < 0.01$ , two-sided Student's *t*-test. Source data are provided as a Source Data file.

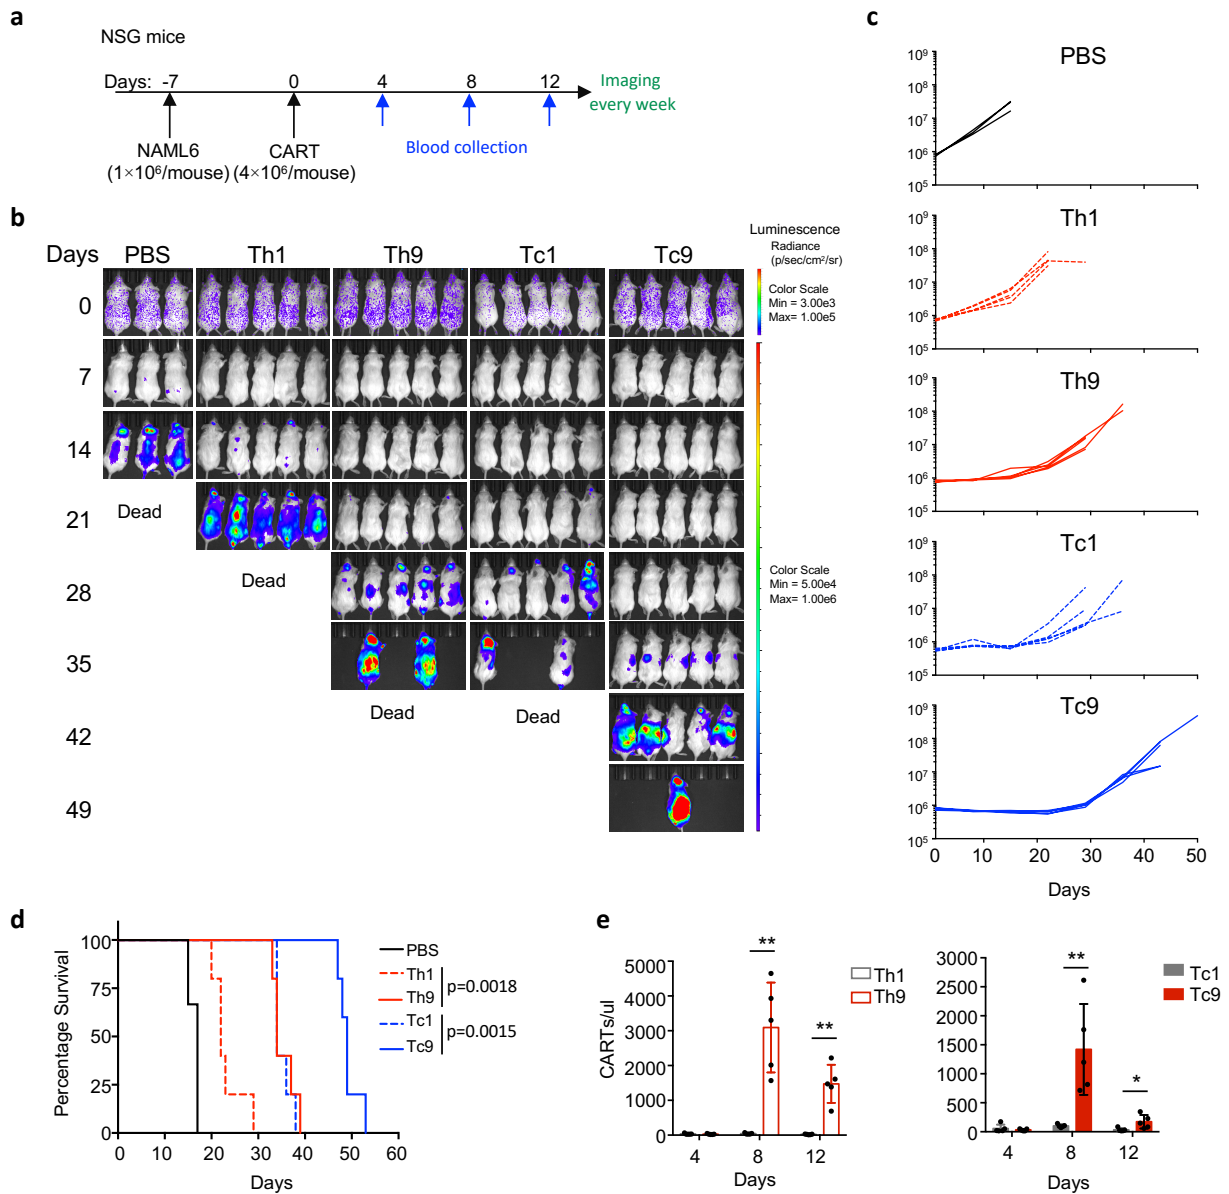

**Supplementary Figure 8. Both CD4<sup>+</sup> Th9 and CD8<sup>+</sup> Tc9 CAR-T cells are able to exert strong antitumor activity against established tumor in vivo. (a)** NSG mice were intravenously injected with  $1 \times 10^6$  NALM6 cells. Seven days later, mice were randomly assigned to 5 groups and were infused intravenously with  $4 \times 10^6$  CAR-T cells. **(b)** Tumor burden measured by bioluminescence at indicated days after CAR-T cell infusion. **(c)** Tumor burden (total flux) quantified by photons/s in mice treated with PBS or CAR-T cells at indicated

days after CAR-T cell infusion. **(d)** Kaplan-Meier plot showing mouse survival. Exact P values from a log-rank test are shown for T1 versus T9 CAR-T cell-treated mice. **(e)** Total number of CD3<sup>+</sup> CAR-T cells in blood of treated mice at different days since CAR-T infusion. Summarized results (n = 5 mice) are shown. Data are presented as mean ± SD (n = 6 donors. \*\*P < 0.01, \*P < 0.05 and \*\*\*P < 0.001, two-sided Student's *t*-test). Source data are provided as a Source Data file.

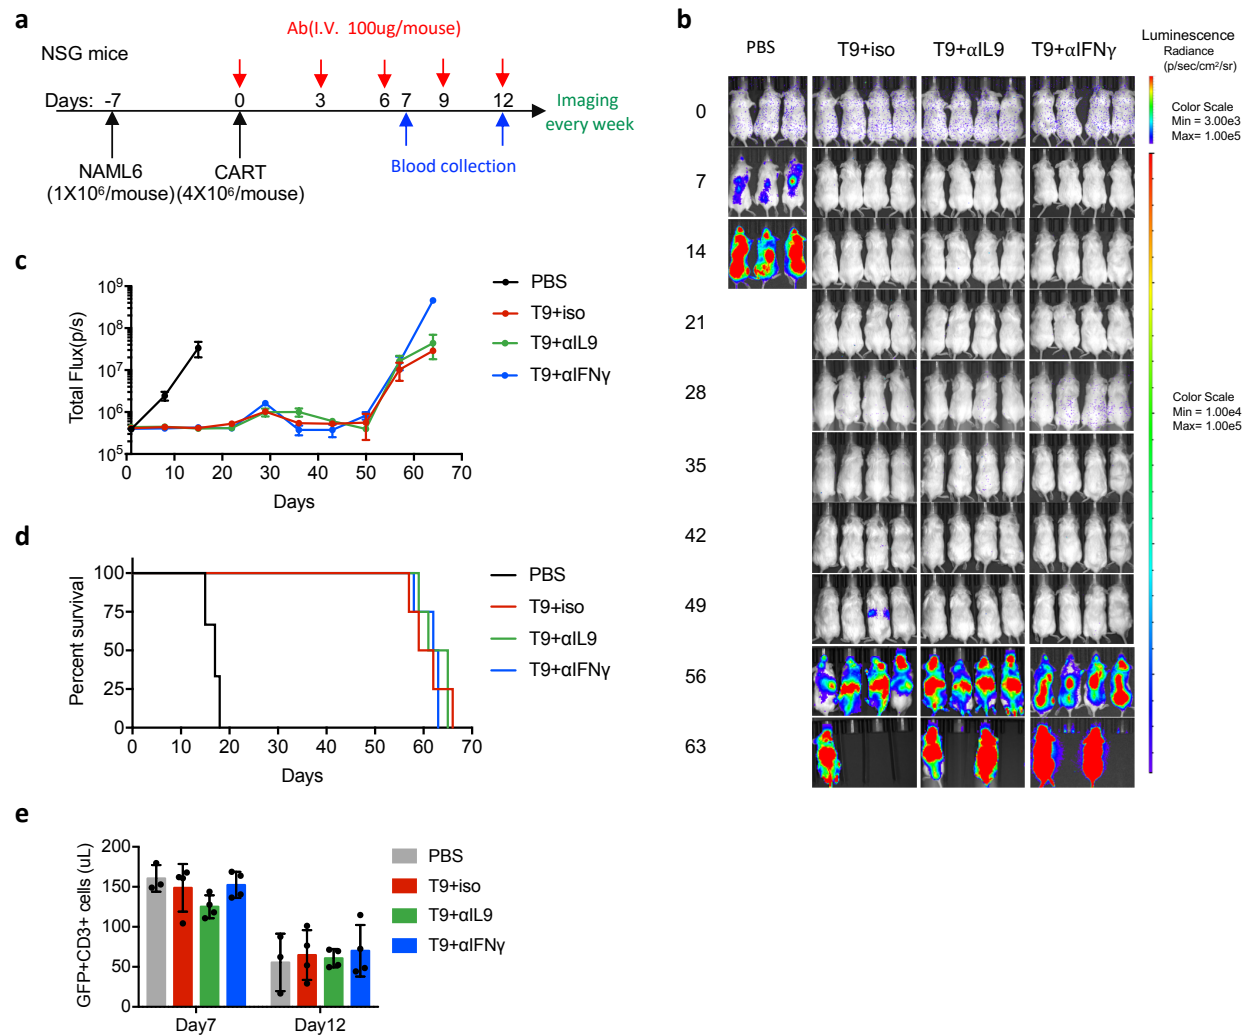

**Supplementary Figure 9. IL9 and IFN<sub>γ</sub> do not play a major role in T9 CAR-T cell-mediated antitumor effects in vivo.** (a) NSG mice were intravenously injected with  $1 \times 10^6$  NALM6 cells. Seven days later, mice were randomly assigned to 4 groups and were infused intravenously with  $4 \times 10^6$  CD3<sup>+</sup> CAR-T cells. Cytokine-neutralizing antibodies were infused intravenously every 3 days from day 0 to day 12 at a dose of 100 µg/mouse/time. (b) Tumor burden measured by bioluminescence at indicated days since CAR-T cell infusion. (c) Tumor burden (total flux) quantified by photons/s in mice treated with PBS or CAR-T cells at indicated days since CAR-T cell infusion. (d) Kaplan-Meier plot showing mouse survival. (e) Total number of CD3<sup>+</sup> CAR-T cells in blood of treated mice at days 7 and 12 after CAR-T infusion.

n = 3 mice in PBS group, n = 4 in other groups. Data are presented as mean  $\pm$  SD. Source data are provided as a Source Data file.

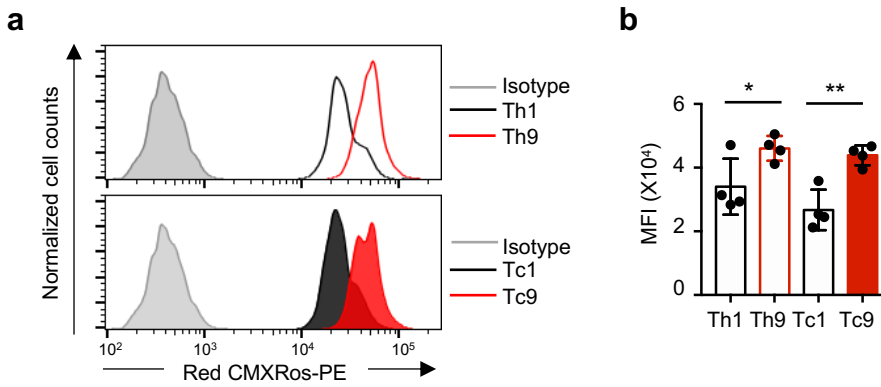

**Supplementary Figure 10. (a)** Representative flow plots showing frequency of Red CMXRos<sup>+</sup> cells 8 days after CAR-T transfer. Cells were pre-gated for GFP<sup>+</sup>CD3<sup>+</sup>CD8<sup>+</sup> or GFP<sup>+</sup>CD3<sup>+</sup>CD4<sup>+</sup> T cells. **(b)** Summarized data of mean fluorescent intensity (MFI) for Red CMXRos staining (n = 4 mice). Data are presented as mean ± SD. \*P < 0.05 and \*\*P < 0.01, two-sided Student's *t*-test.

Source data are provided as a Source Data file.

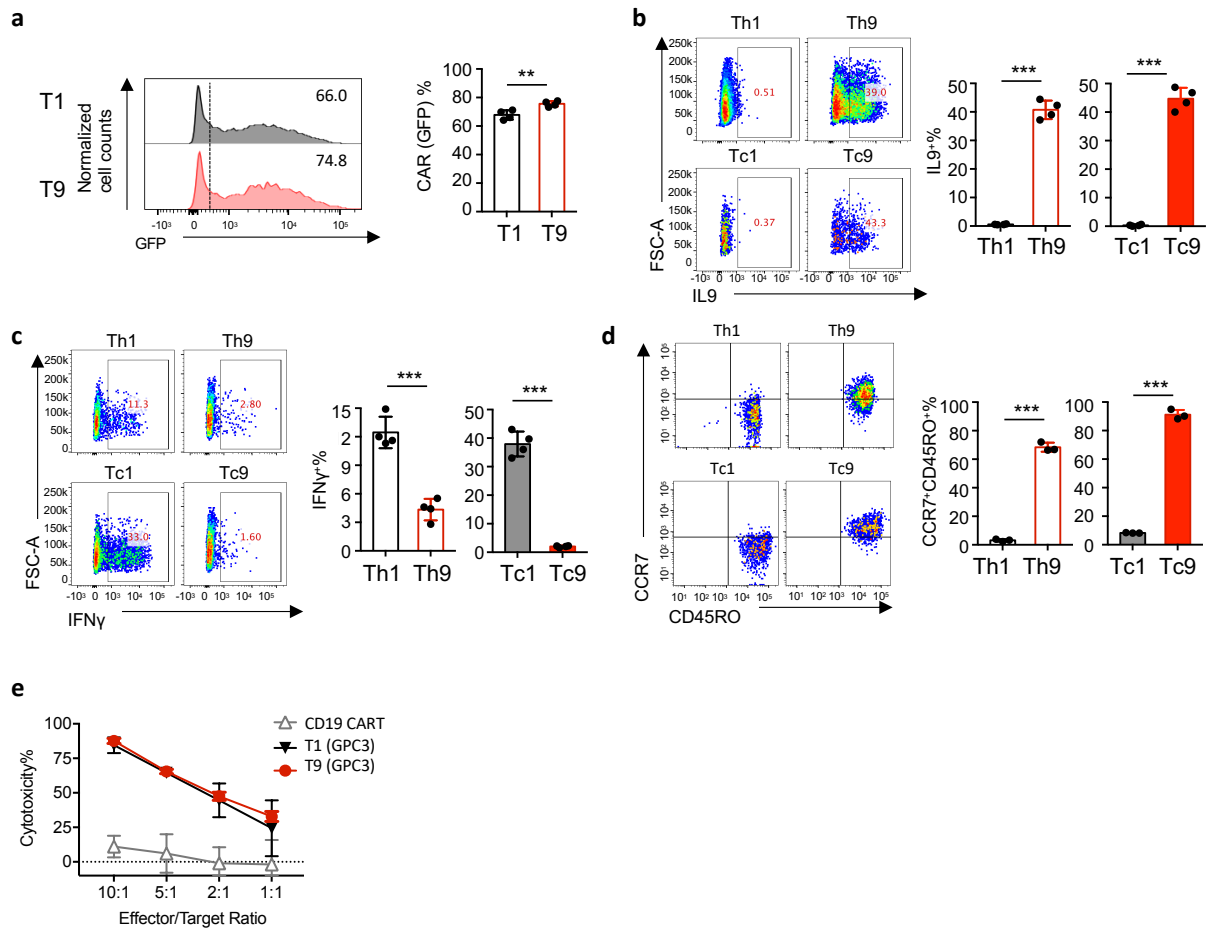

**Supplementary Figure 11. Antitumor effects of GPC3 CAR-T cells.** GPC3 CAR-T cells were generated and expanded for 14 days under Th1- or Th9-polarization condition. **(a)** CAR (GFP) expression (in percentage) was calculated in CD3<sup>+</sup> cell population (n = 4 donors). **(b)** Representative flow plots (left panels) and summarized data (right panels; n = 4 donors) showing IL9 expression in GPC3 CAR-T cells. Cells were pre-gated for GFP<sup>+</sup>CD3<sup>+</sup>CD8<sup>+</sup> or GFP<sup>+</sup>CD3<sup>+</sup>CD4<sup>+</sup> T cells. **(c)** Representative flow plots (left panels) and summarized data (right panels; n = 4 donors) showing IFN $\gamma$  expression in CAR-T cells. Cells were pre-gated for GFP<sup>+</sup>CD3<sup>+</sup>CD8<sup>+</sup> or GFP<sup>+</sup>CD3<sup>+</sup>CD4<sup>+</sup> T cells. **(d)** Representative flow plots and pie charts (n = 3 donors) showing CCR7 or CD45RO expression on CAR-T cells. **(e)** Percentage of specific lysis of CAR-T cells against target tumor cells (HepG2) at indicated E:T ratios determined by flow

cytometry in 24 hour culture. Experiments were performed with three biological replicates and data (n = 3) shown are representative of two independent experiments. Data are presented as mean  $\pm$  SD. \*P < 0.05, \*\*P < 0.01, and \*\*\*P < 0.001, two-sided Student's *t*-test. Source data are provided as a Source Data file.
